# Supplementary material
Source: PubMed Central journal article supplement (PMC1885624)

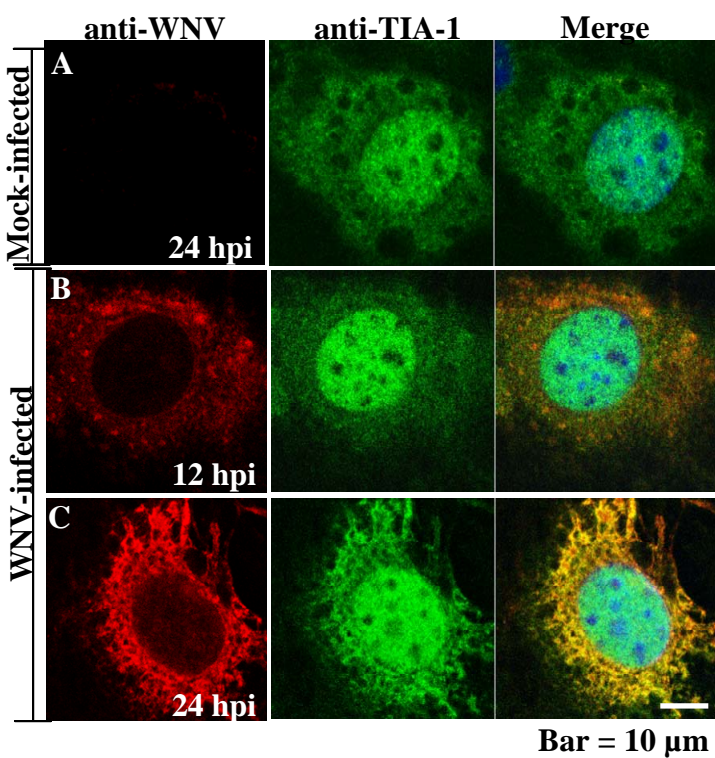

Supplement: pnas_0703348104_1.pdf [file pnas_0703348104_1.pdf]

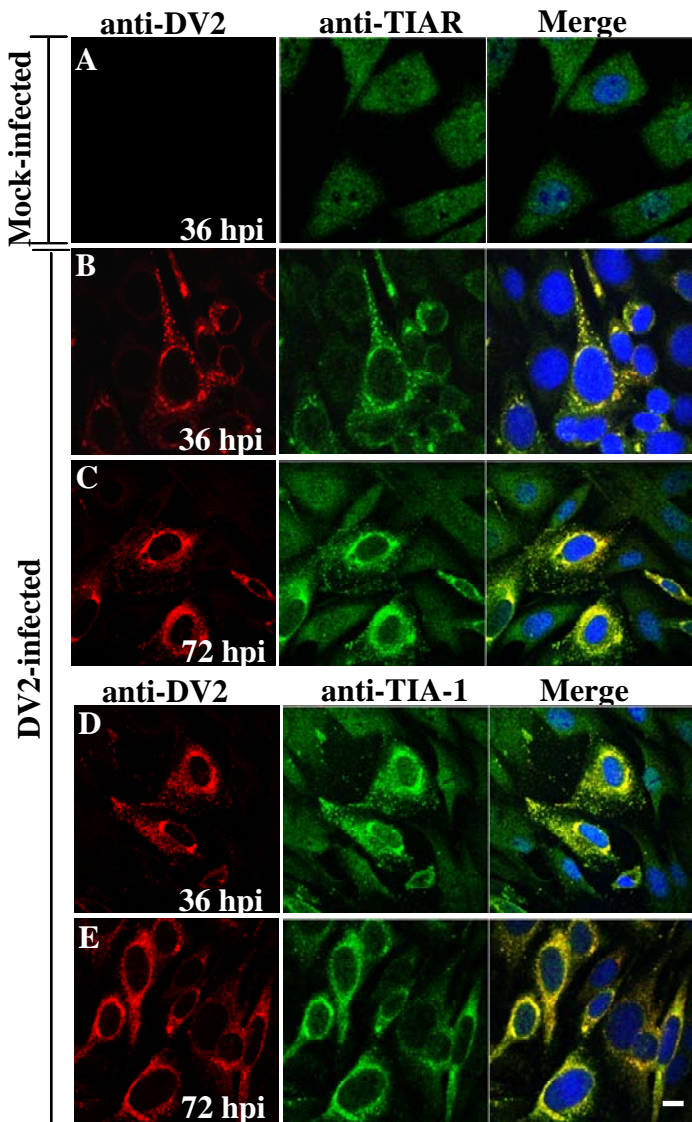

Bar = 10  $\mu$ m

Supplement: pnas_0703348104_2.pdf [file pnas_0703348104_2.pdf]

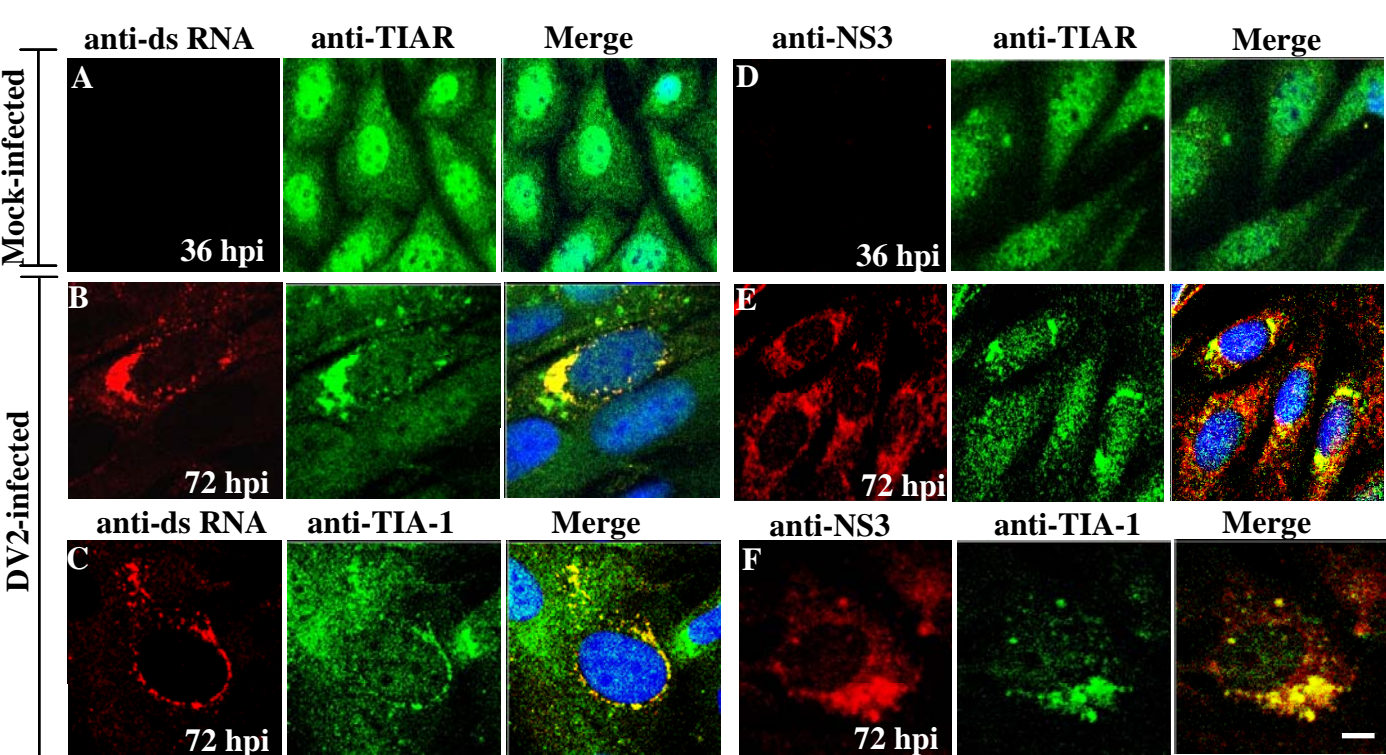

Supplement: pnas_0703348104_3.pdf [file pnas_0703348104_3.pdf]

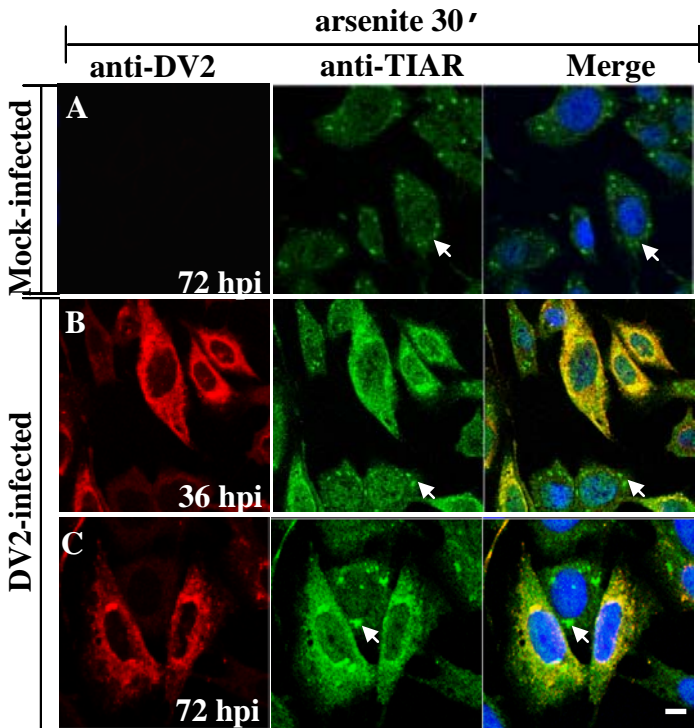

Bar = 10  $\mu$ m

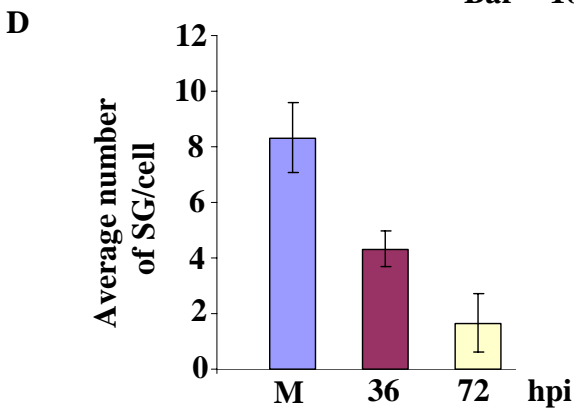

**E**

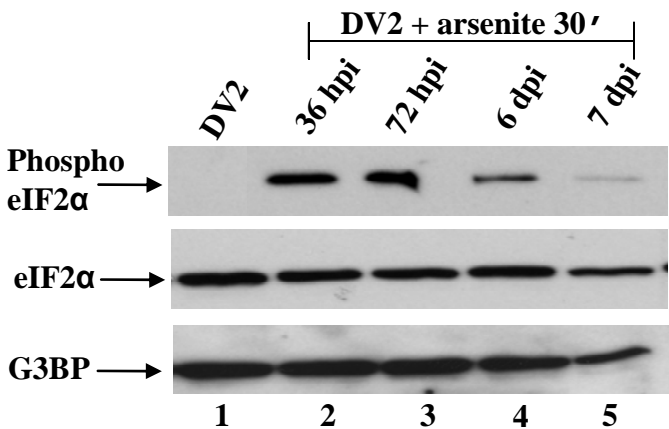

Supplement: pnas_0703348104_4.pdf [file pnas_0703348104_4.pdf]

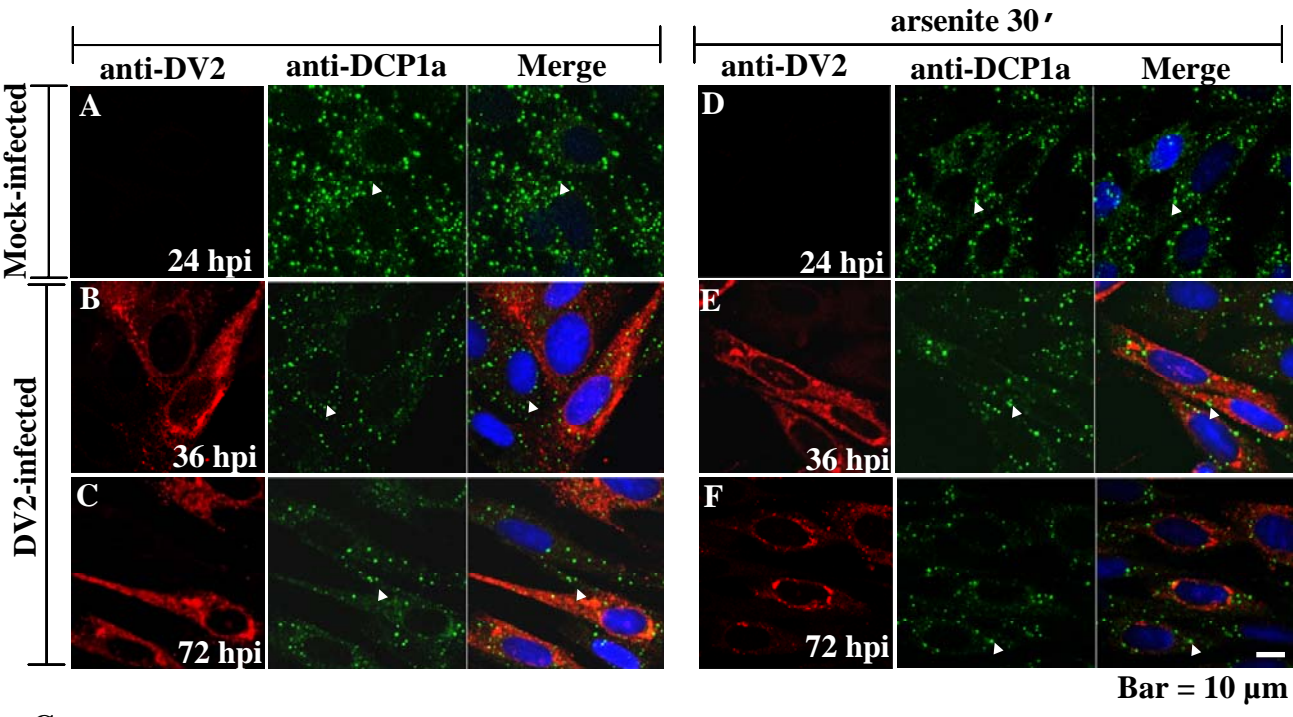

Bar = 10  $\mu$ m

**G**

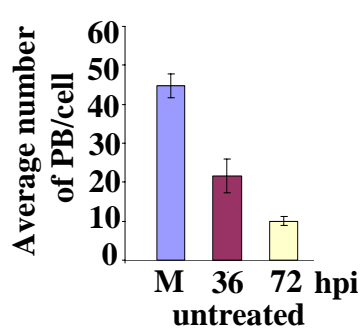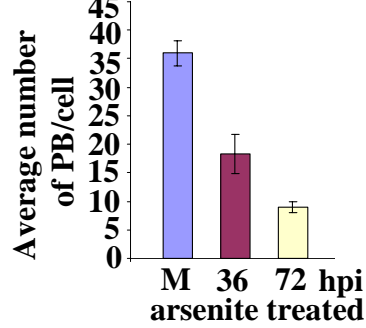

Supplement: pnas_0703348104_5.pdf [file pnas_0703348104_5.pdf]
